# Supplementary material for: Association between nutritional status and the immune response in HIV + patients under HAART: protocol for a systematic review
Source: Syst Rev. 2014 Feb 10;3:9. doi: 10.1186/2046-4053-3-9 (PMC3922999; doi:10.1186/2046-4053-3-9)
Supplement: Additional file S — Data collection form. [file 2046-4053-3-9-S3.pdf]

# Data collection form

---

## Notes:

- Be consistent in the order and style used to describe each report.
- Record any missing or unclear information so to indicate that the information was not found in the study report(s) but not forgotten.

|                                                                                                               |                                                                                                                               |
|---------------------------------------------------------------------------------------------------------------|-------------------------------------------------------------------------------------------------------------------------------|
| Review title                                                                                                  | Association between nutritional status and the immune response in HIV+ patients under HAART: Protocol for a systematic review |
| Study ID ( <i>surname of first author and year first full report of study was published e.g. Smith 2001</i> ) |                                                                                                                               |
| Notes                                                                                                         |                                                                                                                               |

## General Information

|                                                                      |  |
|----------------------------------------------------------------------|--|
| Date form completed<br>( <i>dd/mm/yyyy</i> )                         |  |
| Name of person extracting data                                       |  |
| Reference citation (e.g. Medline)                                    |  |
| Study author contact details                                         |  |
| Type of publication<br>( <i>e.g. full report, abstract, letter</i> ) |  |
| Notes:                                                               |  |

## Study eligibility

| Study Characteristics     | Eligibility criteria                                                                                                                                                    | Eligibility criteria met? |                          |                          | Location in text or source (pg & ¶/fig/table) |
|---------------------------|-------------------------------------------------------------------------------------------------------------------------------------------------------------------------|---------------------------|--------------------------|--------------------------|-----------------------------------------------|
|                           |                                                                                                                                                                         | Yes                       | No                       | Unclear/<br>unspecified  |                                               |
| Type of study             | Experimental study including <u>randomized controlled trials (RCTs)</u> or <u>cluster-randomized trials (CRTs)</u> .                                                    | <input type="checkbox"/>  | <input type="checkbox"/> | <input type="checkbox"/> |                                               |
|                           | Quasi-experimental studies including <u>quasi-randomized trials</u> , <u>controlled before-after studies (CBAs)</u> and <u>interrupted time series studies (ITSS)</u> . | <input type="checkbox"/>  | <input type="checkbox"/> | <input type="checkbox"/> |                                               |
|                           | Observational studies including <u>cohort</u> , <u>case-control</u> and <u>cross-sectional studies</u> .                                                                | <input type="checkbox"/>  | <input type="checkbox"/> | <input type="checkbox"/> |                                               |
| Participants and setting  | <u>HIV-1 infected adults</u>                                                                                                                                            | <input type="checkbox"/>  | <input type="checkbox"/> | <input type="checkbox"/> |                                               |
|                           | <u>Non pregnant</u>                                                                                                                                                     | <input type="checkbox"/>  | <input type="checkbox"/> | <input type="checkbox"/> |                                               |
|                           | Low or middle income country setting (as listed in the <i>World Bank Group's classification of countries by income groups (see Annexe)</i> )                            | <input type="checkbox"/>  | <input type="checkbox"/> | <input type="checkbox"/> |                                               |
|                           | Naive to ART (if initiating treatment at T0) or under ART < 1 year                                                                                                      | <input type="checkbox"/>  | <input type="checkbox"/> | <input type="checkbox"/> |                                               |
| Types of comparison       | Undernourished vs well nourished (according to a predefined cutoff value)                                                                                               | <input type="checkbox"/>  | <input type="checkbox"/> | <input type="checkbox"/> |                                               |
| Types of outcome measures | <b>Primary outcome:</b>                                                                                                                                                 |                           |                          |                          |                                               |
|                           | 1) CD4 counts or CD4%                                                                                                                                                   | <input type="checkbox"/>  | <input type="checkbox"/> | <input type="checkbox"/> |                                               |
|                           | 2) Change in CD4 counts between timepoints                                                                                                                              | <input type="checkbox"/>  | <input type="checkbox"/> | <input type="checkbox"/> |                                               |
|                           | <b>Secondary outcomes:</b>                                                                                                                                              |                           |                          |                          |                                               |
| Types of determinants     | 1) Immune failure                                                                                                                                                       | <input type="checkbox"/>  | <input type="checkbox"/> | <input type="checkbox"/> |                                               |
|                           | 2) Time to immune failure                                                                                                                                               | <input type="checkbox"/>  | <input type="checkbox"/> | <input type="checkbox"/> |                                               |
|                           | <b>Body composition</b>                                                                                                                                                 | <input type="checkbox"/>  | <input type="checkbox"/> | <input type="checkbox"/> |                                               |
|                           | 1) Weight                                                                                                                                                               | <input type="checkbox"/>  | <input type="checkbox"/> | <input type="checkbox"/> |                                               |
|                           | 2) BMI                                                                                                                                                                  | <input type="checkbox"/>  | <input type="checkbox"/> | <input type="checkbox"/> |                                               |
|                           | 3) MUAC                                                                                                                                                                 | <input type="checkbox"/>  | <input type="checkbox"/> | <input type="checkbox"/> |                                               |
|                           | 4) Skinfold                                                                                                                                                             | <input type="checkbox"/>  | <input type="checkbox"/> | <input type="checkbox"/> |                                               |
|                           | 5) BIA (bioelectrical impedance)                                                                                                                                        | <input type="checkbox"/>  | <input type="checkbox"/> | <input type="checkbox"/> |                                               |
|                           | <b>Inflammation</b>                                                                                                                                                     | <input type="checkbox"/>  | <input type="checkbox"/> | <input type="checkbox"/> |                                               |
|                           | 1) Albumin                                                                                                                                                              | <input type="checkbox"/>  | <input type="checkbox"/> | <input type="checkbox"/> |                                               |
|                           | 2) Hemoglobin                                                                                                                                                           | <input type="checkbox"/>  | <input type="checkbox"/> | <input type="checkbox"/> |                                               |

|                                                                                                      |                                                                                                                           |                                                                            |  |
|------------------------------------------------------------------------------------------------------|---------------------------------------------------------------------------------------------------------------------------|----------------------------------------------------------------------------|--|
|                                                                                                      | 3) CRP                                                                                                                    | <input type="checkbox"/> <input type="checkbox"/> <input type="checkbox"/> |  |
| Results                                                                                              | Associative measure between one or more dichotomized/categorized nutritional markers OR weight change AND immune response | <input type="checkbox"/> <input type="checkbox"/> <input type="checkbox"/> |  |
| INCLUDE <input type="checkbox"/> EXCLUDE <input type="checkbox"/> UNCERTAIN <input type="checkbox"/> |                                                                                                                           |                                                                            |  |
| Reason for exclusion                                                                                 |                                                                                                                           |                                                                            |  |
| Notes:                                                                                               |                                                                                                                           |                                                                            |  |

DO NOT PROCEED IF STUDY EXCLUDED FROM REVIEW

## Characteristics of included studies

### Methods

|                     | Descriptions as stated in report/paper | Location in text or source ( <i>pg &amp; ¶/fig/table</i> ) |
|---------------------|----------------------------------------|------------------------------------------------------------|
| Objectives          |                                        |                                                            |
| Design              |                                        |                                                            |
| Unit of observation |                                        |                                                            |
| Start date          |                                        |                                                            |
| End date            |                                        |                                                            |

|                                                                                     |                                                                                                        |  |
|-------------------------------------------------------------------------------------|--------------------------------------------------------------------------------------------------------|--|
| <b>Duration of participation</b><br><br><i>(from recruitment to last follow-up)</i> |                                                                                                        |  |
| <b>Ethical approval needed/ obtained for study</b>                                  | <input type="checkbox"/> <input type="checkbox"/> <input type="checkbox"/><br>Yes      No      Unclear |  |
| <b>Notes:</b><br><br>                                                               |                                                                                                        |  |

### Participants and immune response

|                                                                                                       | Description                                                                                                              | Location in text or source (pg & ¶/fig/table) |
|-------------------------------------------------------------------------------------------------------|--------------------------------------------------------------------------------------------------------------------------|-----------------------------------------------|
| <b>Population description</b><br><i>(from which study participants were drawn)</i>                    |                                                                                                                          |                                               |
| <b>Setting and context</b><br><i>(For example, as part of a RCT of nutritional intervention, ...)</i> |                                                                                                                          |                                               |
| <b>Inclusion criteria</b>                                                                             |                                                                                                                          |                                               |
| <b>Exclusion criteria</b>                                                                             |                                                                                                                          |                                               |
| <b>Method of recruitment of participants</b> (e.g. phone, mail, clinic patients)                      |                                                                                                                          |                                               |
| <b>Informed consent obtained</b>                                                                      | <input type="checkbox"/> <input type="checkbox"/> <input type="checkbox"/><br>Yes      No      Unclear/<br>not indicated |                                               |

|                                                                       |                                                                                                                                                                                                                            |  |
|-----------------------------------------------------------------------|----------------------------------------------------------------------------------------------------------------------------------------------------------------------------------------------------------------------------|--|
| Total no. of subjects                                                 | Included: _____<br>Excluded: _____                                                                                                                                                                                         |  |
| Participation agreement (%)                                           |                                                                                                                                                                                                                            |  |
| Clusters<br><i>(if applicable, no., type, no. people per cluster)</i> |                                                                                                                                                                                                                            |  |
| Baseline discrepancies<br><i>(if applicable)</i>                      |                                                                                                                                                                                                                            |  |
| Lost to follow-up                                                     | How many: _____<br>Characteristics of those LTFU:<br>_____<br>_____<br>Statistically different from those who remained?<br>Yes <input type="checkbox"/> No <input type="checkbox"/> Not indicated <input type="checkbox"/> |  |
| Mortality                                                             | How many: _____<br>Characteristics of those LTFU:<br>_____<br>_____<br>Statistically different from those who remained?<br>Yes <input type="checkbox"/> No <input type="checkbox"/> Not indicated <input type="checkbox"/> |  |
| Withdrawals                                                           | How many: _____<br>Characteristics of those LTFU:<br>_____<br>_____<br>Statistically different from those who remained?<br>Yes <input type="checkbox"/> No <input type="checkbox"/> Not indicated <input type="checkbox"/> |  |
| Number of total person-years (if applicable)                          |                                                                                                                                                                                                                            |  |
| Missing data                                                          |                                                                                                                                                                                                                            |  |

|                                                               |                                                                                                                                                                                                                                                                                                                                                                                    |  |
|---------------------------------------------------------------|------------------------------------------------------------------------------------------------------------------------------------------------------------------------------------------------------------------------------------------------------------------------------------------------------------------------------------------------------------------------------------|--|
| <b>Outcome(s)</b><br><br>Definition, measure & classification | <u>Primary outcome</u><br>1) Absolute CD4 counts<br>2) Relative CD4 counts ( <i>% change in CD4 between timepoints</i> )<br><br><i>Indicate if used as continuous or categorized (indicate cut-off points used by the authors):</i><br><hr/> <hr/> <hr/><br>Method used to measure CD4 at each time points:<br>1) FACS counter <input type="checkbox"/><br>2) Other<br><hr/> <hr/> |  |
|                                                               | <u>Secondary outcomes</u><br>1) Immune failure<br>2) Time to immune failure<br><br>Operational definition of immune failure used by the authors:<br><hr/> <hr/> <hr/> <hr/>                                                                                                                                                                                                        |  |
| <b>Determinants</b>                                           | <b>Body composition</b><br><b>Weight</b><br><u>Methods of assessment</u><br>1. Was the weight auto-reported or measured by an expert<br>Auto-reported <input type="checkbox"/> Uncertain <input type="checkbox"/><br>Measured by expert <input type="checkbox"/> Not indicated <input type="checkbox"/><br><br>Comments: _____                                                     |  |

**BMI**

*Indicate cut-off points used to categorized this variable*

---

---

---

**Methods of assessment**

**1. Did the observer receive a formal training in BMI measurement**

Yes ☐      Uncertain ☐

No ☐      Not indicated ☐

*Comments:* \_\_\_\_\_

**2. If longitudinal measurements: Did the same observer take all measurements for a same patient**

Yes ☐      Uncertain ☐

No ☐      Not indicated ☐

*Comments:* \_\_\_\_\_

**MUAC (mid upper arm circumference)**

*Indicate cut-off points used to categorized this variable*

---

---

---

**Methods of assessment**

**1. Did the observer receive a formal training in MUAC measurement**

Yes ☐      Uncertain ☐

No ☐      Not indicated ☐

*Comments:* \_\_\_\_\_

**2. If longitudinal measurements: Did the same observer take all measurements for a same patient**

Yes ☐      Uncertain ☐

No ☐      Not indicated ☐

*Comments:* \_\_\_\_\_

**3. At each timepoint, was the measurement repeated 2-3 times and mean value measured**

Yes ☐      Uncertain ☐

No ☐      Not indicated ☐

*Comments:* \_\_\_\_\_

**Skinfold**

*Indicate cut-off values used to categorized this variable*

---

---

---

**Methods of assessment**

1. Specify anatomical location(s): \_\_\_\_\_

---

2. Which brand of Calliper were used

Brand: \_\_\_\_\_

Not specified ☐

3. Did the observer receive a formal training in SK measurement

Yes ☐ Uncertain ☐

No ☐ Not indicated ☐

*Comments:* \_\_\_\_\_

3. Was the measurement technique calibrated by a second expert  
in the course of the study

Yes ☐ Uncertain ☐

No ☐ Not indicated ☐

*Comments:* \_\_\_\_\_

4. If longitudinal measurements: Did the same observer take all  
measurements for a same patient

Yes ☐ Uncertain ☐

No ☐ Not indicated ☐

*Comments:* \_\_\_\_\_

5. At each time point, was the measurement repeated 2-3 times  
and mean value measured

Yes ☐ Uncertain ☐

No ☐ Not indicated ☐

*Comments:* \_\_\_\_\_

|  |                                                                                                                                                                                                                                                                                                                                                                                                                                                                                                                                                                                                                                                                                                                                                                                                                                                                                                                                                                                                                                                                                                                                                                                                                                                                                                                                                                                                                                                                                                                                                                                                                                                                                                                                                                                                                           |  |
|--|---------------------------------------------------------------------------------------------------------------------------------------------------------------------------------------------------------------------------------------------------------------------------------------------------------------------------------------------------------------------------------------------------------------------------------------------------------------------------------------------------------------------------------------------------------------------------------------------------------------------------------------------------------------------------------------------------------------------------------------------------------------------------------------------------------------------------------------------------------------------------------------------------------------------------------------------------------------------------------------------------------------------------------------------------------------------------------------------------------------------------------------------------------------------------------------------------------------------------------------------------------------------------------------------------------------------------------------------------------------------------------------------------------------------------------------------------------------------------------------------------------------------------------------------------------------------------------------------------------------------------------------------------------------------------------------------------------------------------------------------------------------------------------------------------------------------------|--|
|  | <p><b>BIA/BIS (bioelectrical impedance)</b></p> <p><u>Indicate which compartments were measured/estimated using this technique</u></p> <ul style="list-style-type: none"> <li>• BCM <input type="checkbox"/></li> <li>• TBW <input type="checkbox"/></li> <li>• FFM <input type="checkbox"/></li> <li>• ICW <input type="checkbox"/></li> <li>• ECW <input type="checkbox"/></li> <li>• Phase angle</li> </ul> <p><u>Methods of assessment</u></p> <p>1. Were the following factors evaluated and/or taken into account</p> <ul style="list-style-type: none"> <li>• Consumption of water      Yes <input type="checkbox"/>    No <input type="checkbox"/></li> <li>• Consumption of food        Yes <input type="checkbox"/>    No <input type="checkbox"/></li> <li>• Physical activity in hours before measure      Yes <input type="checkbox"/>    No <input type="checkbox"/></li> <li>• Ambient temperature        Yes <input type="checkbox"/>    No <input type="checkbox"/></li> <li>• Medical conditions affecting electrolytes      Yes <input type="checkbox"/>    No <input type="checkbox"/></li> </ul> <p>2. What was the position of the electrodes</p> <ul style="list-style-type: none"> <li>• Hand-to-foot <input type="checkbox"/></li> <li>• Hand-to-hand <input type="checkbox"/></li> <li>• Foot-to-foot <input type="checkbox"/></li> <li>• Not specified <input type="checkbox"/></li> </ul> <p>3. Which BIA/BIS equation was used</p> <p>_____</p> <p>_____</p> <p>_____</p> <p>Not specified <input type="checkbox"/></p> <p>4. If applicable, is the predictive equation used validated for the study population</p> <p>Yes, specified by the authors <input type="checkbox"/></p> <p>No, specified by the authors <input type="checkbox"/></p> <p>Not specified <input type="checkbox"/></p> |  |
|  | <p><b>Inflammatory markers</b></p> <p><b>Albumin</b></p> <p><i>Indicate cut-off values used to categorized this variable</i></p> <p>_____</p> <p>_____</p> <p>_____</p> <p><u>Methods of assessment</u></p> <p>1. Was the serum sample</p> <p>Fresh <input type="checkbox"/></p> <p>Frozen <input type="checkbox"/></p> <p>Not indicated <input type="checkbox"/></p> <p>2. Technique used to measure level of albumin</p> <p>_____</p> <p>_____</p>                                                                                                                                                                                                                                                                                                                                                                                                                                                                                                                                                                                                                                                                                                                                                                                                                                                                                                                                                                                                                                                                                                                                                                                                                                                                                                                                                                      |  |

|                                                                                                              |                                                                                                                                                                                                                                                                                                                                                                                                                                                                                                                            |  |
|--------------------------------------------------------------------------------------------------------------|----------------------------------------------------------------------------------------------------------------------------------------------------------------------------------------------------------------------------------------------------------------------------------------------------------------------------------------------------------------------------------------------------------------------------------------------------------------------------------------------------------------------------|--|
|                                                                                                              | <p><b>Haemoglobin</b><br/> <i>Indicate cut-off values used to categorized this variable</i></p> <hr/> <hr/> <hr/> <p><u>Methods of assessment</u><br/> 1. Source of blood<br/> Capillary <input type="checkbox"/><br/> Venous <input type="checkbox"/><br/> Not indicated <input type="checkbox"/><br/> 2. Assessment method<br/> HemoCue <input type="checkbox"/><br/> Cyanmethemoglobin <input type="checkbox"/><br/> Other <input type="checkbox"/><br/> Specify: _____<br/> Not indicated <input type="checkbox"/></p> |  |
|                                                                                                              | <p><b>CRP</b><br/> <i>Indicate cut-off values used to categorized this variable</i></p> <hr/> <hr/> <hr/> <p><u>Methods of assessment</u><br/> 1. Type of test<br/> Low Sensitivity <input type="checkbox"/><br/> High Sensitivity <input type="checkbox"/><br/> Not indicated <input type="checkbox"/></p>                                                                                                                                                                                                                |  |
| <p><b>Confounding factors/<br/> effect modifiers</b><br/> accounted for in the<br/> analyses</p>             |                                                                                                                                                                                                                                                                                                                                                                                                                                                                                                                            |  |
| <p><b>Results</b><br/> <i>(specify, e.g. OR, RR, IRR)</i><br/> <i>(specify the reference<br/> group)</i></p> | <p><b>Crude</b></p>                                                                                                                                                                                                                                                                                                                                                                                                                                                                                                        |  |
|                                                                                                              | <p><b>Adjusted</b></p>                                                                                                                                                                                                                                                                                                                                                                                                                                                                                                     |  |
| <p><b>Reported limitations of<br/> study's methods/results</b></p>                                           |                                                                                                                                                                                                                                                                                                                                                                                                                                                                                                                            |  |

|                                                                                      |  |  |
|--------------------------------------------------------------------------------------|--|--|
| <b>Key conclusions</b> ( <i>as stated in report/paper</i> )                          |  |  |
| <b>Scientific quality</b><br>(specify tool, e.g. modified EPHPP tool)<br><br>authors |  |  |
| Notes:                                                                               |  |  |

### Other information

|                                                                                              |  |  |
|----------------------------------------------------------------------------------------------|--|--|
| Study funding sources<br>( <i>including role of funders</i> )                                |  |  |
| Possible conflicts of interest<br>( <i>for study authors</i> )                               |  |  |
| References of relevant studies                                                               |  |  |
| Correspondence required for further study information<br>( <i>from whom, what and when</i> ) |  |  |
| Notes:                                                                                       |  |  |

## Appendix

*The World Bank Group's classification of countries by income groups*

Available from:

<http://data.worldbank.org/about/country-classifications/country-and-lending-groups>

### Low-income economies

|                          |                 |              |
|--------------------------|-----------------|--------------|
| Afghanistan              | Gambia, The     | Mozambique   |
| Bangladesh               | Guinea          | Myanmar      |
| Benin                    | Guinea-Bissau   | Nepal        |
| Burkina Faso             | Haiti           | Niger        |
| Burundi                  | Kenya           | Rwanda       |
| Cambodia                 | Korea, Dem Rep. | Sierra Leone |
| Central African Republic | Kyrgyz Republic | Somalia      |
| Chad                     | Liberia         | Tajikistan   |
| Comoros                  | Madagascar      | Tanzania     |
| Congo, Dem. Rep          | Malawi          | Togo         |
| Eritrea                  | Mali            | Uganda       |
| Ethiopia                 | Mauritania      | Zimbabwe     |

### Lower-middle-income economies

|                  |                       |                       |
|------------------|-----------------------|-----------------------|
| Albania          | Indonesia             | Samoa                 |
| Armenia          | India                 | São Tomé and Príncipe |
| Belize           | Iraq                  | Senegal               |
| Bhutan           | Kiribati              | Solomon Islands       |
| Bolivia          | Kosovo                | South Sudan           |
| Cameroon         | Lao PDR               | Sri Lanka             |
| Cape Verde       | Lesotho               | Sudan                 |
| Congo, Rep.      | Marshall Islands      | Swaziland             |
| Côte d'Ivoire    | Micronesia, Fed. Sts. | Syrian Arab Republic  |
| Djibouti         | Moldova               | Timor-Leste           |
| Egypt, Arab Rep. | Mongolia              | Tonga                 |
| El Salvador      | Morocco               | Ukraine               |
| Fiji             | Nicaragua             | Uzbekistan            |
| Georgia          | Nigeria               | Vanuatu               |
| Ghana            | Pakistan              | Vietnam               |
| Guatemala        | Papua New Guinea      | West Bank and Gaza    |
| Guyana           | Paraguay              | Yemen, Rep.           |
| Honduras         | Philippines           | Zambia                |

### Upper-middle-income economies

Angola  
Algeria  
American Samoa  
Antigua and Barbuda  
Argentina  
Azerbaijan  
Belarus  
Bosnia and Herzegovina  
Botswana  
Brazil  
Bulgaria  
Chile  
China  
Colombia  
Costa Rica  
Cuba  
Dominica  
Dominican Republic

Ecuador  
Gabon  
Grenada  
Iran, Islamic Rep.  
Jamaica  
Jordan  
Kazakhstan  
Latvia  
Lebanon  
Libya  
Lithuania  
Macedonia, FYR  
Malaysia  
Maldives  
Mauritius  
Mexico  
Montenegro  
Namibia

Palau  
Panama  
Peru  
Romania  
Russian Federation  
Serbia  
Seychelles  
South Africa  
St. Lucia  
St. Vincent and the Grenadines  
Suriname  
Thailand  
Tunisia  
Turkey  
Turkmenistan  
Tuvalu  
Uruguay  
Venezuela, RB
